# Supplementary material for: New prospects for PET in prostate cancer imaging: a physicist's viewpoint
Source: PubMed Central journal article supplement (PMC6890878; doi:10.1186/2197-7364-1-11), 2014-09-09

a

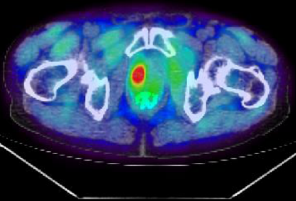

b

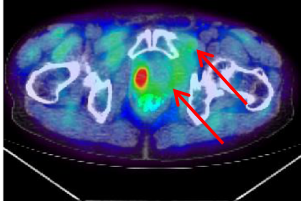

c

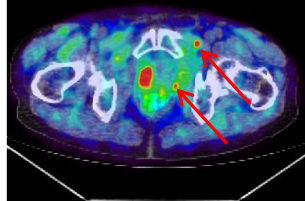

Supplement: 40658_2014_9002_MOESM3_ESM.pdf [file 40658_2014_9002_MOESM3_ESM.pdf]
