# Supplementary material for: New prospects for PET in prostate cancer imaging: a physicist's viewpoint
Source: PubMed Central journal article supplement (PMC6890878; doi:10.1186/2197-7364-1-11), 2014-09-09
Supplement: 40658_2014_9002_MOESM5_ESM.pdf [file 40658_2014_9002_MOESM5_ESM.pdf]

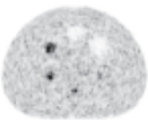

OSEM 4mm  
(a)

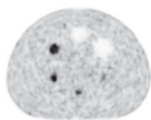

PSF 2mm  
(b)

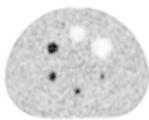

PSF+TOF 2mm  
(c)

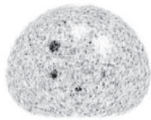

OSEM 2mm  
(d)

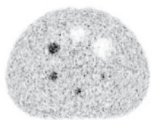

OSEM+TOF 2mm  
(e)
